# Supplementary material for: Network Pharmacology and Bioinformatics Analyses Identify Intersection Genes of Vitamin D3 and COVID-19 as Potential Therapeutic Targets
Source: PubMed Central journal article supplement (PMC9095980; doi:10.3389/fphar.2022.874637), 2022-04-28
Supplement: Table1.pdf [file Table1.pdf]

Supplementary Table1 Intersecting genes

| Symbol   | logFC    | logCPM   | PValue   | FDR      |
|----------|----------|----------|----------|----------|
| ACE2     | -3.4348  | 4.652933 | 1.32E-35 | 2.17E-33 |
| APOE     | 1.774274 | 8.452704 | 1.31E-08 | 9.07E-08 |
| ACE      | -2.05242 | 4.57186  | 7.61E-38 | 1.45E-35 |
| CXCL10   | 2.840116 | 6.713147 | 5.05E-11 | 4.97E-10 |
| CXCL8    | 3.192488 | 7.004054 | 2.28E-12 | 2.73E-11 |
| ALB      | 6.551447 | 6.716306 | 1.93E-05 | 0.000078 |
| S100A8   | -3.4684  | 9.036812 | 3.36E-19 | 9.9E-18  |
| CALCA    | 4.112722 | 3.88141  | 0.00151  | 0.004061 |
| S100A9   | -3.32313 | 10.70686 | 6.88E-21 | 2.43E-19 |
| GPT      | -2.09946 | 4.052604 | 4.46E-17 | 9.85E-16 |
| IL1A     | -1.67185 | 3.19508  | 2.17E-07 | 1.24E-06 |
| CXCL1    | 2.662374 | 7.354785 | 8.66E-12 | 9.47E-11 |
| NCAM1    | -2.76619 | 3.157155 | 1.88E-26 | 1.18E-24 |
| PLA2G7   | 1.99941  | 4.664355 | 7.05E-13 | 9.15E-12 |
| FCGR1A   | 1.759756 | 3.214269 | 1.9E-07  | 1.09E-06 |
| MAF      | -1.6338  | 4.783415 | 1.43E-29 | 1.35E-27 |
| FABP2    | -4.5311  | 4.662591 | 1.58E-40 | 3.41E-38 |
| MMP3     | 4.590926 | 5.803164 | 1.28E-12 | 1.59E-11 |
| CSF2     | 2.806299 | 3.059881 | 1.75E-06 | 8.45E-06 |
| FCGR3A   | 2.166347 | 5.628051 | 2.32E-13 | 3.21E-12 |
| SPP1     | 3.931615 | 7.819997 | 1.09E-14 | 1.8E-13  |
| ELANE    | 2.075596 | 3.86379  | 0.021456 | 0.042617 |
| IDO1     | 3.451822 | 5.804004 | 2.63E-09 | 2.02E-08 |
| MPO      | 2.666926 | 3.041876 | 0.00454  | 0.010829 |
| ANPEP    | -2.492   | 8.737918 | 8.46E-13 | 1.08E-11 |
| SERPINE1 | 2.016549 | 6.640921 | 6.8E-10  | 5.63E-09 |
| CXCR2    | -2.0888  | 3.208276 | 2.32E-13 | 3.21E-12 |
| IL1RN    | -2.89712 | 6.886155 | 5.04E-31 | 5.43E-29 |
| PTGS1    | -1.87733 | 4.460807 | 2.57E-29 | 2.37E-27 |
| RBP4     | 2.003422 | 5.812486 | 0.000158 | 0.000527 |
| LBP      | 3.202092 | 3.319789 | 1.32E-05 | 5.47E-05 |
| ADAMTS1  | -2.03772 | 4.969183 | 5.48E-27 | 3.7E-25  |
| PRKAR2B  | -1.6771  | 4.037889 | 1.14E-15 | 2.13E-14 |
| GDF15    | 2.623627 | 6.849782 | 4.24E-17 | 9.42E-16 |
| ATP2B4   | -1.59527 | 6.134298 | 1.77E-15 | 3.22E-14 |
| MKI67    | 1.858368 | 5.78494  | 1.09E-21 | 4.21E-20 |
| ZBTB16   | -2.68518 | 3.117729 | 2.97E-25 | 1.63E-23 |
| ERBB2    | 1.747675 | 7.617832 | 1.78E-05 | 7.21E-05 |
| MET      | 2.116022 | 6.165509 | 1.1E-11  | 1.19E-10 |
| EPHB2    | 2.006127 | 4.760394 | 3.14E-10 | 2.74E-09 |
| PLAU     | 2.003859 | 6.213019 | 2.53E-14 | 3.95E-13 |
| MME      | -2.45468 | 3.905106 | 7.26E-17 | 1.57E-15 |

|         |          |          |          |          |
|---------|----------|----------|----------|----------|
| CAVI    | -1.53697 | 6.323286 | 3.23E-12 | 3.79E-11 |
| APOB    | -4.67319 | 4.879587 | 6.56E-29 | 5.42E-27 |
| FGB     | 3.211376 | 4.059977 | 0.000365 | 0.001128 |
| RHOB    | -1.93557 | 8.847718 | 2.04E-30 | 2.06E-28 |
| HAVCR1  | 2.870829 | 3.097959 | 8.5E-06  | 3.67E-05 |
| MTHFD1L | 1.76698  | 4.446674 | 7.18E-22 | 2.9E-20  |
| NTS     | 2.779363 | 5.091462 | 0.001539 | 0.004127 |
| KIT     | -1.58456 | 3.813299 | 1.11E-13 | 1.6E-12  |
| CKB     | -2.59324 | 7.348584 | 2.18E-30 | 2.19E-28 |
| KAT2B   | -1.58957 | 4.292966 | 1.57E-35 | 2.52E-33 |
| LTF     | -2.66059 | 6.648502 | 5.26E-13 | 6.88E-12 |
| CXCL6   | 2.51359  | 4.004898 | 9.39E-07 | 4.75E-06 |
| MMP1    | 1.672913 | 7.691047 | 0.000118 | 0.000404 |
| PRKCG   | 2.664789 | 3.307939 | 4.21E-08 | 2.67E-07 |
| FGG     | 2.226889 | 3.515613 | 0.025345 | 0.049431 |
| CHI3L1  | 2.316964 | 5.331932 | 3E-10    | 2.63E-09 |
| GSTM1   | -1.77993 | 4.379591 | 4.15E-06 | 1.88E-05 |
| KLF2    | -1.71528 | 7.253853 | 2.63E-21 | 9.86E-20 |

---
